# Supplementary material for: Synthesis of copper–isonicotinate metal–organic frameworks simply by mixing solid reactants and investigation of their adsorptive properties for the removal of the fluorescein dye
Source: Royal Society of Chemistry journal article supplement (doi:10.1039/c4nj00411f), 2014-01-01
Supplement: c4nj00411f1.pdf [file c4nj00411f1.pdf]

**Synthesis of copper-isonicotinate metal-organic frameworks simply by mixing solid reactants and investigation of its adsorptive properties in the removal of fluorescein dye**

Adedibu C. Tella<sup>1\*</sup>, Samson O. Owalude<sup>1</sup>, Christianah A. Ojekanmi<sup>1</sup> and Oluwatobi S. Oluwafemi<sup>2\*</sup>

<sup>1</sup>Department of Chemistry, P.M.B.1515, University of Ilorin, Nigeria.

<sup>2</sup>Department of Chemistry, Cape-peninsula University of Technology, P.O. Box 652, Cape Town 8000, South Africa.

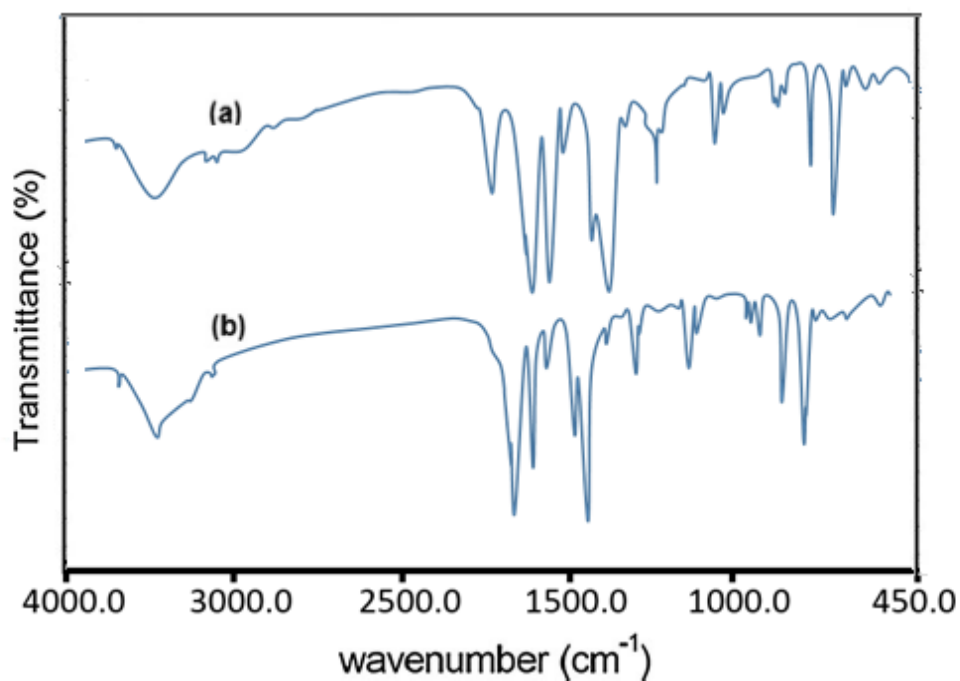

**Figure S1.** FT-IR spectra of (a) **1** (MSR) and (b) **2** obtained from desolvation of samples of **1**.

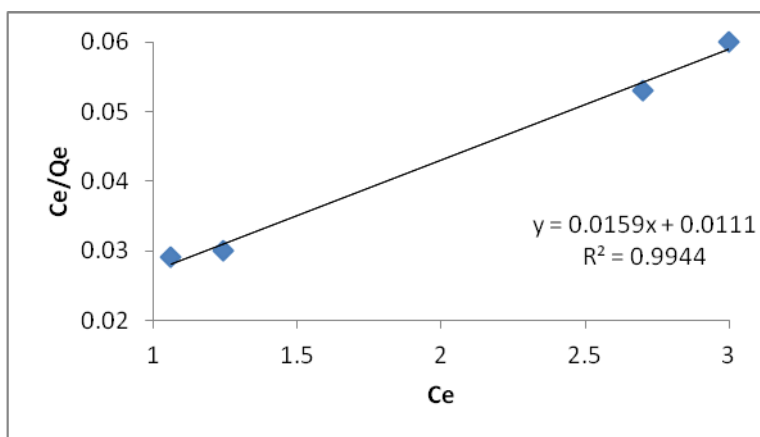

**Figure S2:** Langmuir isotherm plot for the adsorption of fluorescein dye on mCu-INA at Co-3-18 mg/L, temp = 298 °K, pH = 7.8, time = 6 hours at 165 rpm

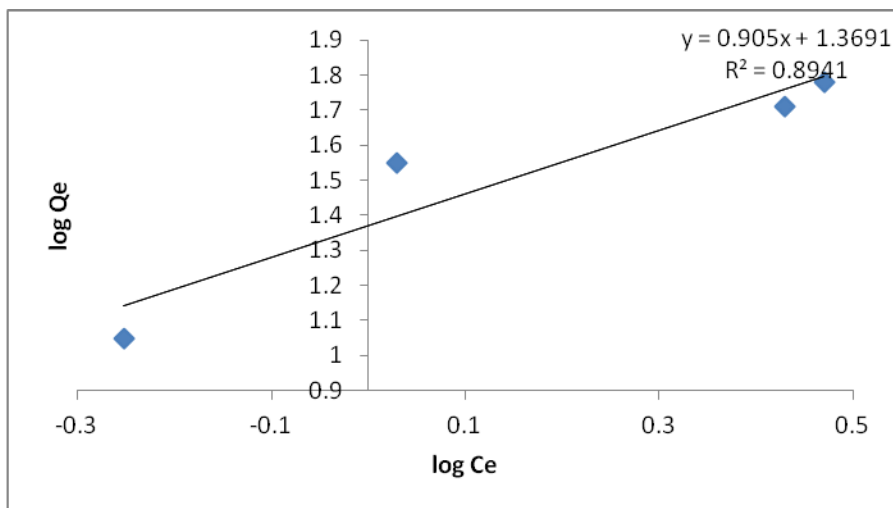

**Figure S3:** Freundlich isotherm plot for the adsorption of fluorescein dye on mCu-INA at Co-3-18 mg/L, temp = 298 K, pH = 7.8, time = 6 hours at 165 rpm

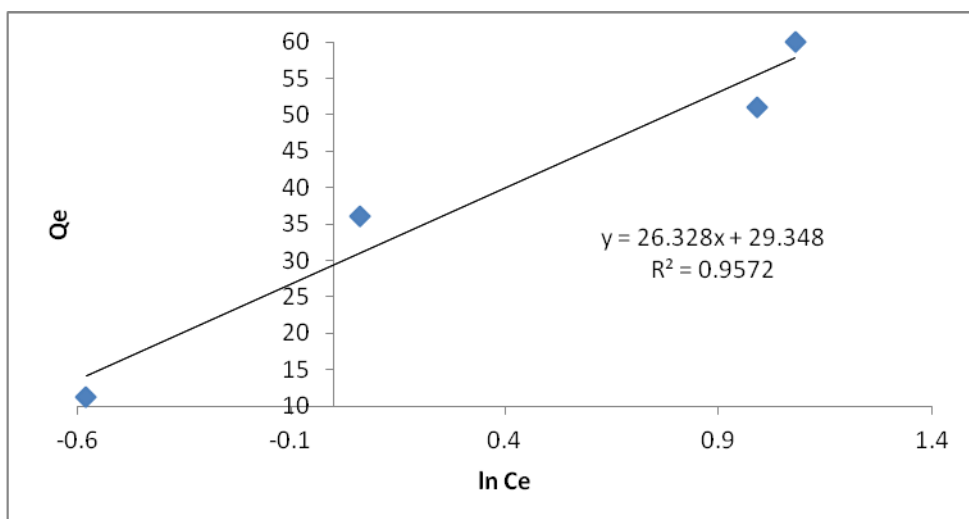

**Figure S4:** Temkin isotherm plot for the adsorption of fluorescein dye on mCu-INA

at Co-3-18 mg/L, temp = 298 K, pH = 7.8, time = 6 hours at 165 rpm

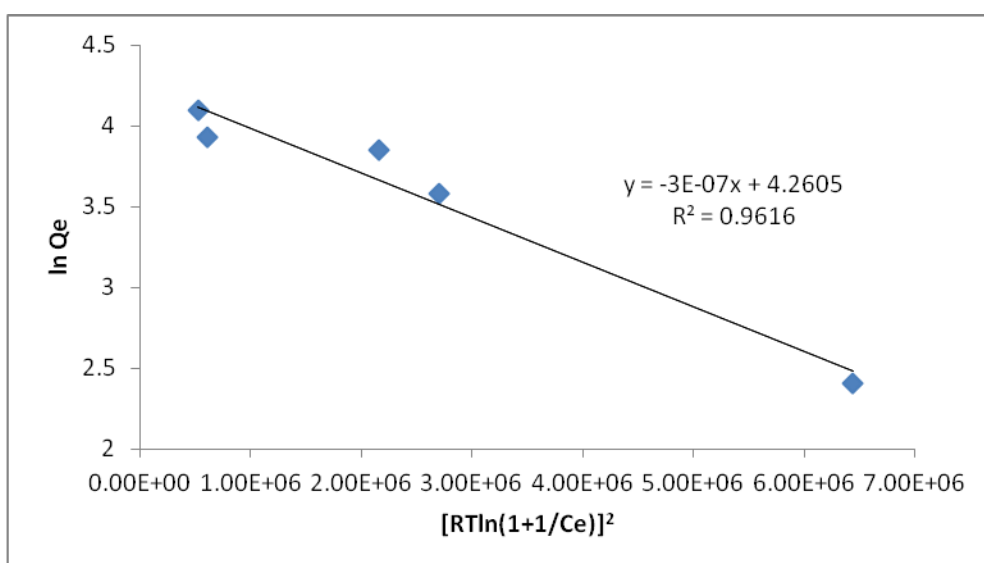

**Figure S5:** Dubinin Radushkevich isotherm plot for the adsorption of fluorescein

dye on mCu-INA at Co-3-18 mg/L, temp = 298 K, pH = 7.8, time = 6 hours at 165 rpm

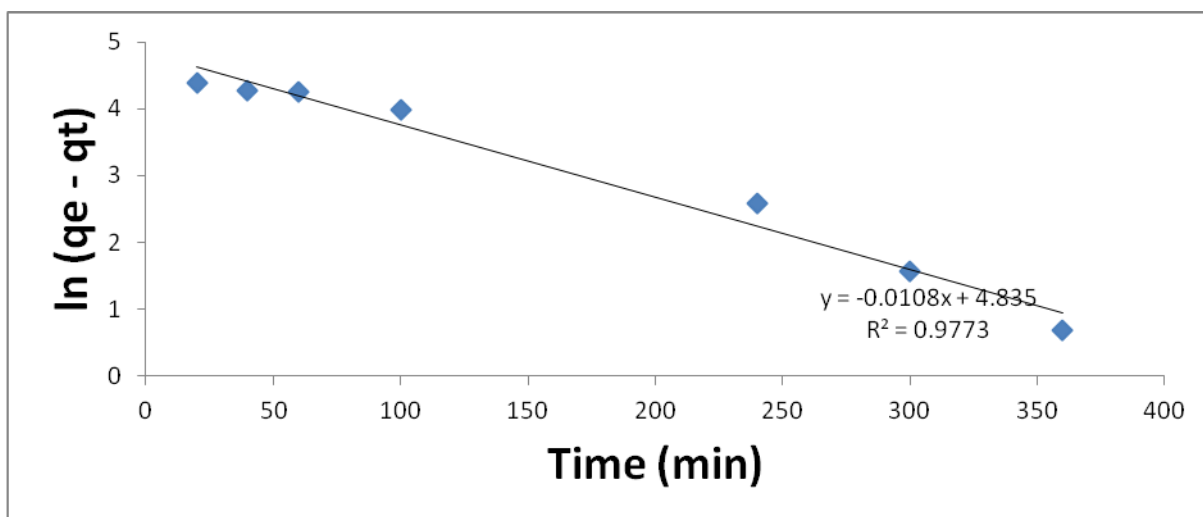

**Figure S6:** Plot of pseudo- first order kinetics of Fluorescein adsorption on mCu-INA

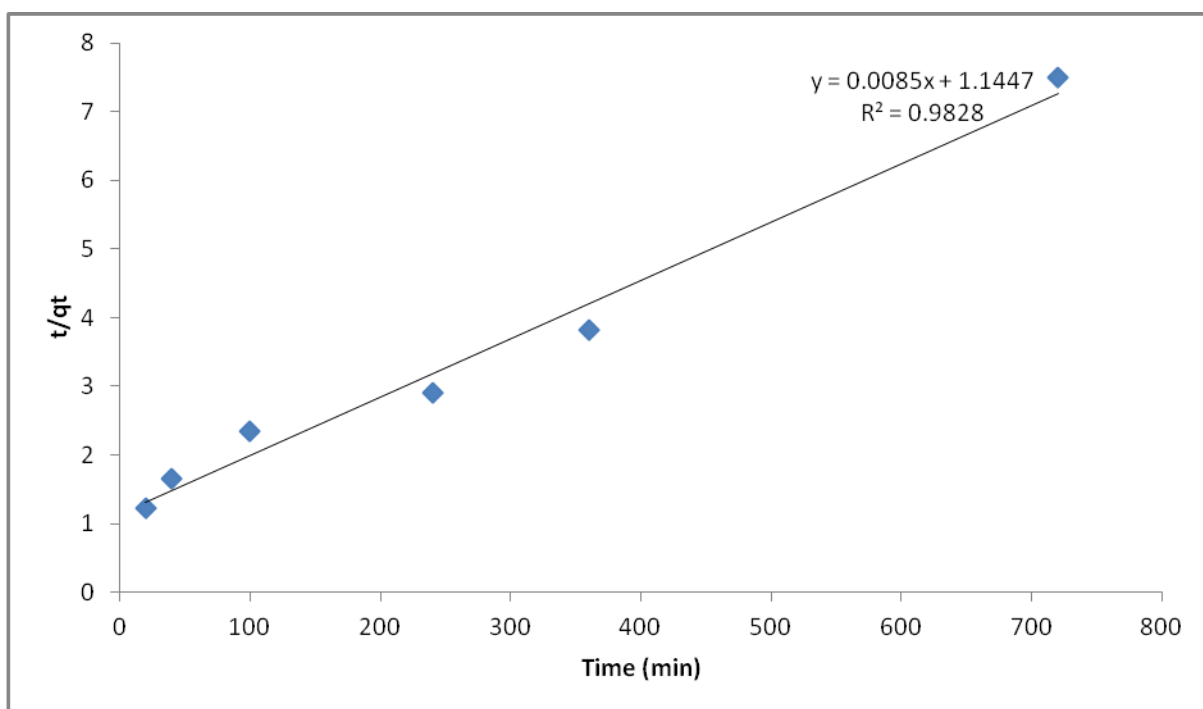

**Figure S7:** Plot of pseudo- second order kinetics of Fluorescein adsorption on mCu-INA

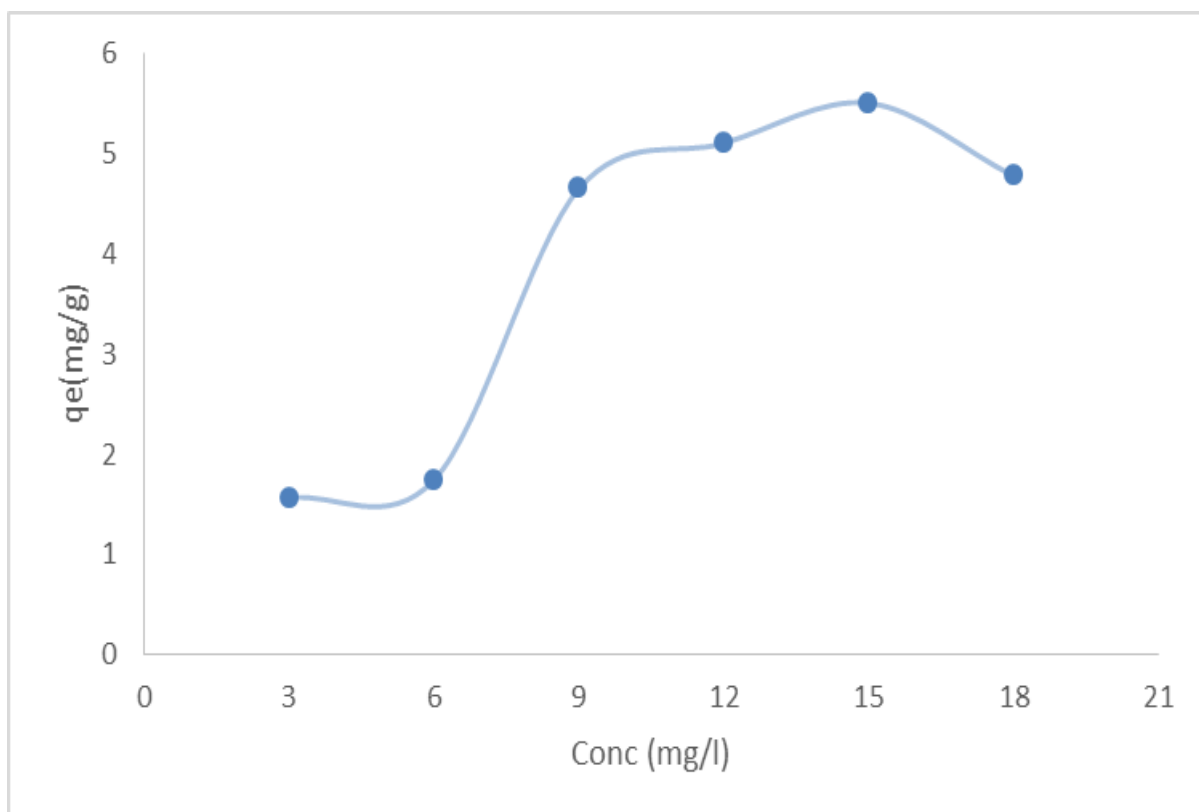

**Fig. S8.** Effect of dye concentration on the adsorption of Fluorescein dye on [Cu(INA)<sub>2</sub>]. Contact time: 360 min, adsorbent concentration: 20 mg, temperature: 298 K, pH: 7.8

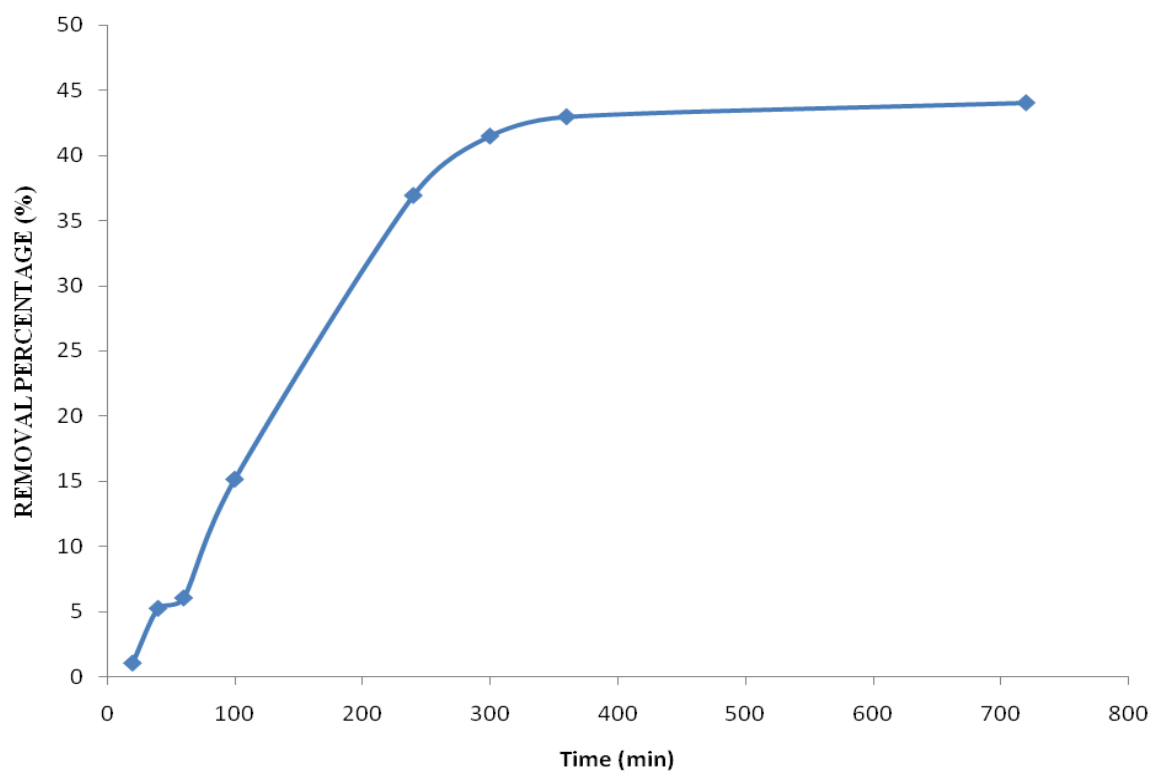

**Fig. S9.** Effect of contact time on the adsorption of fluorescein dye on  $[\text{Cu}(\text{INA})_2]$ . Dye concentration: 15 mg/L, temperature: 298 K, adsorbent dosage: 20 mg, pH = 7.8 at 165 rpm

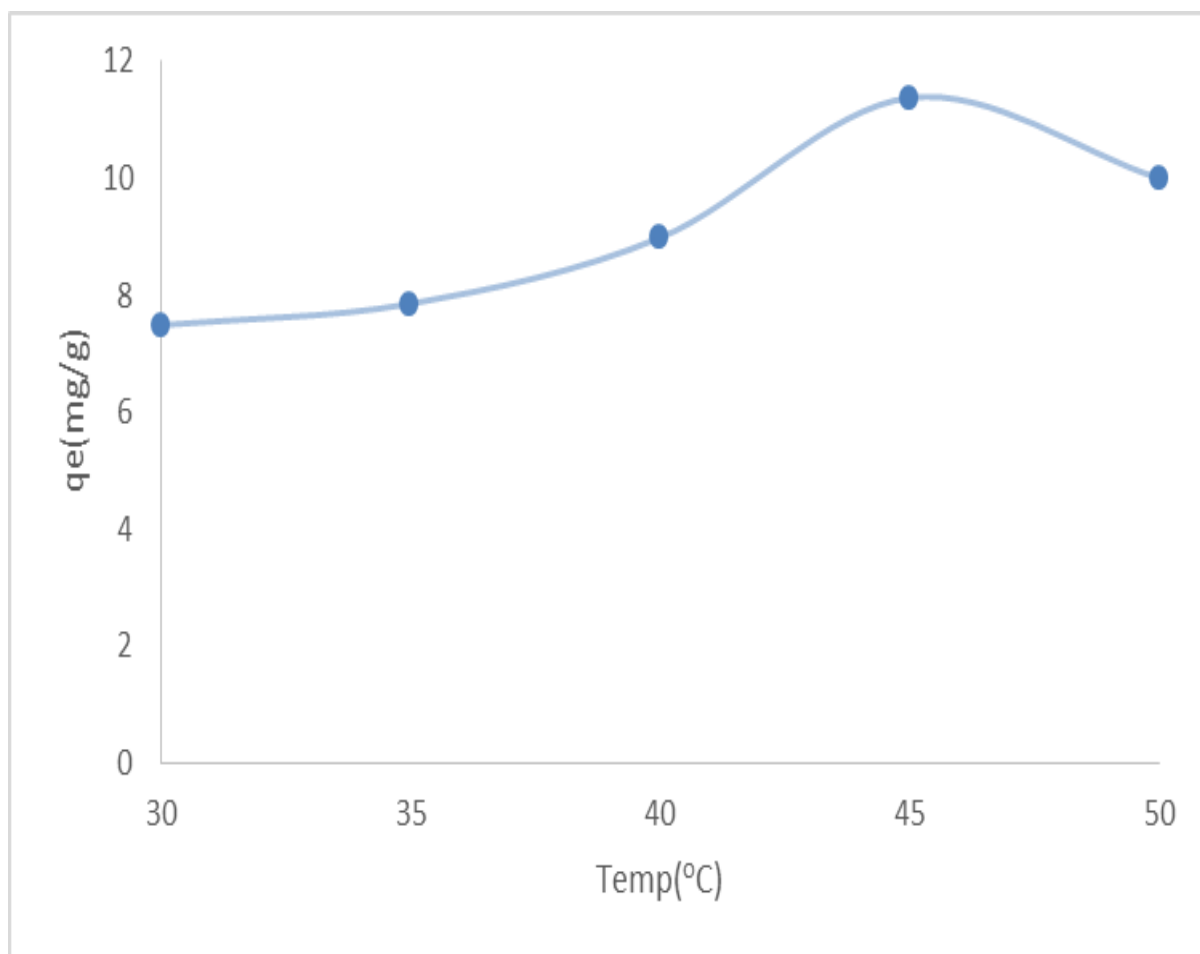

**Fig. S10.** Effect of temperature on the adsorption of Fluorescein on  $[\text{Cu}(\text{INA})_2]$ . Contact time: 360 min, dye concentration: 15 mg/L, adsorbent dosage: 20 mg, pH: 7.8 at 165 rpm.



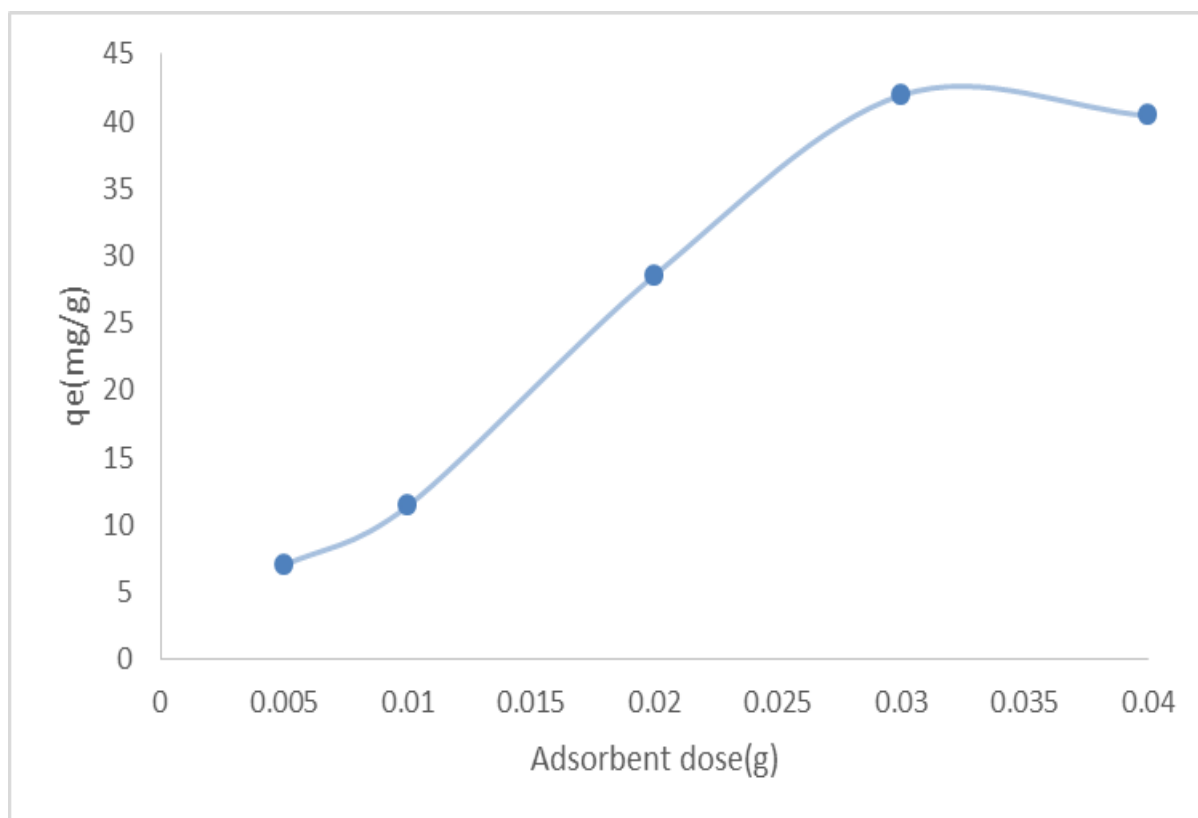

**Fig. S11.** Effect of adsorbent dosage on the adsorption of Fluorescein dye on [Cu(INA)<sub>2</sub>]. Contact time: 360 min, dye concentration: 15 mg/L, temperature: 45 °C, pH: 7.8 at 165 rpm.
